# Supplementary material for: Dynamics of Adaptation in Spatially Heterogeneous Metapopulations
Source: PubMed Central journal article supplement (PMC3570538; doi:10.1371/journal.pone.0054697), 2013-02-12
Supplement: pone.0054697.s001.pdf [file pone.0054697.s001.pdf]

# Supporting information: Dynamics of adaptation in spatially heterogeneous metapopulations

J. Papaïx <sup>1,2,a</sup>, O. David <sup>2,b</sup>, C. Lannou <sup>1,c</sup> & H. Monod <sup>2,d</sup>

26/12/2012

<sup>1</sup>INRA, UMR 1290 BIOGER, F-78850 Thiverval Grignon.

<sup>2</sup>INRA, UR 341 Mathématiques et Informatique Appliquées, F-78350 Jouy-en-Josas.

<sup>a</sup>julien.papaix@jouy.inra.fr

<sup>b</sup>olivier.david@jouy.inra.fr

<sup>c</sup>christian.lannou@grignon.inra.fr

<sup>d</sup>herve.monod@jouy.inra.fr

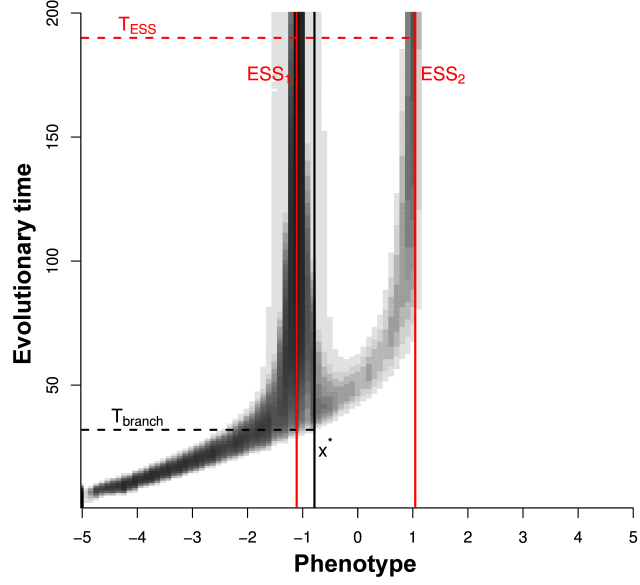

**Figure S1.** Illustration of the measures used to characterize the evolutionary trajectories (see Appendix S4 for more details).  $\hat{x}^*$ : estimated singular strategy;  $T_{\text{branch}}$ : time to reach the singular strategy;  $\text{ESS}_1$  and  $\text{ESS}_2$ : trait values of the specialists;  $T_{\text{ESS}}$ : time to reach the specialists. Parameters are  $m_s = 15\%$ ,  $\delta/\sigma = 1.1$  ( $\delta = -\beta_1 = \beta_2 = 1.1$  and  $\sigma = 1$ ),  $\pi = 0.16$  and  $\text{AI} = 0.7$  (situation B). The lattice environment was used.
