# Supplementary material for: Dynamics of Adaptation in Spatially Heterogeneous Metapopulations
Source: PubMed Central journal article supplement (PMC3570538; doi:10.1371/journal.pone.0054697), 2013-02-12
Supplement: pone.0054697.s002.pdf [file pone.0054697.s002.pdf]

# Supporting information: Dynamics of adaptation in spatially heterogeneous metapopulations

J. Papaïx <sup>1,2,a</sup>, O. David <sup>2,b</sup>, C. Lannou <sup>1,c</sup> & H. Monod <sup>2,d</sup>

26/12/2012

<sup>1</sup>INRA, UMR 1290 BIOGER, F-78850 Thiverval Grignon.

<sup>2</sup>INRA, UR 341 Mathématiques et Informatique Appliquées, F-78350 Jouy-en-Josas.

<sup>a</sup>julien.papaix@jouy.inra.fr

<sup>b</sup>olivier.david@jouy.inra.fr

<sup>c</sup>christian.lannou@grignon.inra.fr

<sup>d</sup>herve.monod@jouy.inra.fr

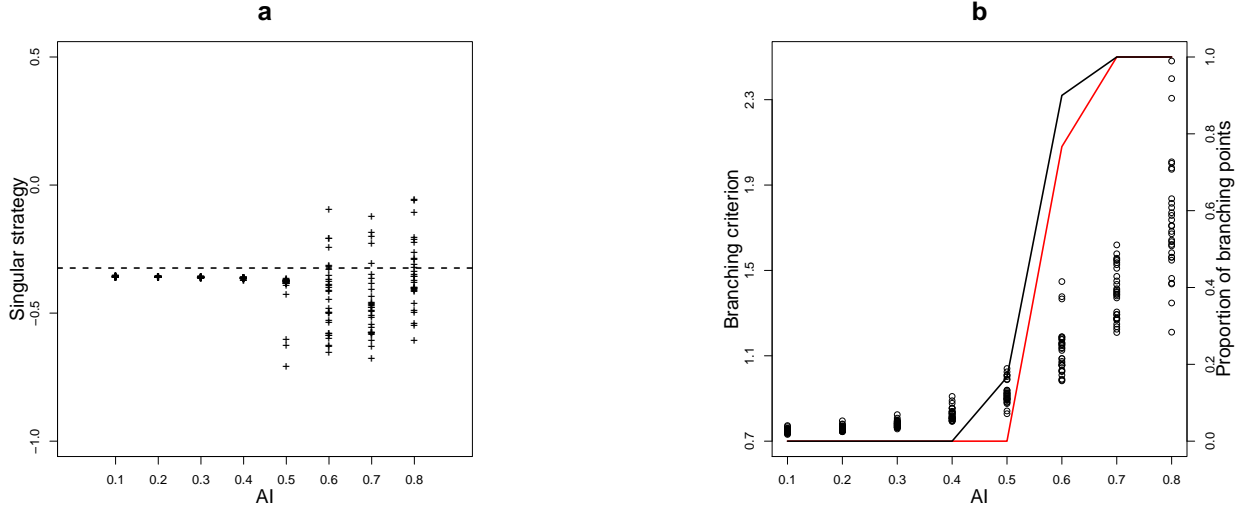

**Figure S2.** Comparison between analytical and simulation results. (a) estimated singular strategy  $\hat{x}^*$  (+) along with theoretical singular strategy  $x^*$  (dashed line) against aggregation level of habitat 2 (AI). (b) branching criterion value (open circle and left Y-axis) along with predicted (black solid line and right Y-axis) and observed (red solid line and right Y-axis) proportions of branching points, against aggregation level of habitat 2. Other parameter values are:  $m_s = 75\%$ ,  $\delta/\sigma = 0.9$  ( $\delta = -\beta_1 = \beta_2 = 0.9$  and  $\sigma = 1$ ) and  $\pi = 0.32$ . The lattice environment was used.
