# Supplementary material for: Dynamics of Adaptation in Spatially Heterogeneous Metapopulations
Source: PubMed Central journal article supplement (PMC3570538; doi:10.1371/journal.pone.0054697), 2013-02-12
Supplement: pone.0054697.s003.pdf [file pone.0054697.s003.pdf]

# Supporting information: Dynamics of adaptation in spatially heterogeneous metapopulations

J. Papaïx <sup>1,2,a</sup>, O. David <sup>2,b</sup>, C. Lannou <sup>1,c</sup> & H. Monod <sup>2,d</sup>

26/12/2012

<sup>1</sup>INRA, UMR 1290 BIOGER, F-78850 Thiverval Grignon.

<sup>2</sup>INRA, UR 341 Mathématiques et Informatique Appliquées, F-78350 Jouy-en-Josas.

<sup>a</sup>julien.papaix@jouy.inra.fr

<sup>b</sup>olivier.david@jouy.inra.fr

<sup>c</sup>christian.lannou@grignon.inra.fr

<sup>d</sup>herve.monod@jouy.inra.fr

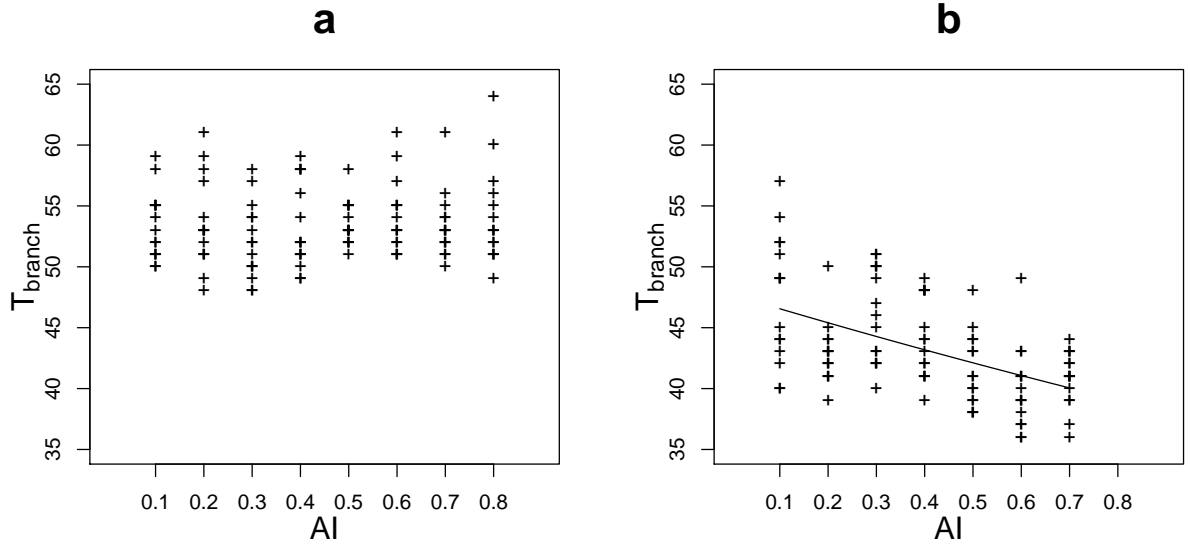

**Figure S3.** The time to reach the singular strategy ( $T_{\text{branch}}$ ) plotted against the aggregation level of habitat 2 (AI) in the case of situation A (a) and situation B (b). The relationship between  $T_{\text{branch}}$  and AI was tested by a GLM with Poisson distributed errors. The solid line indicates that the slope was significantly different from 0 with a 0.001 threshold. Other parameters are: (a)  $m_s = 0.75$ ,  $\delta/\sigma = 1.1$  ( $\delta = -\beta_1 = \beta_2 = 1.1$  and  $\sigma = 1$ ) and  $\pi = 0.32$ ; (b)  $m_s = 0.15$ ,  $\delta/\sigma = 1.1$  ( $\delta = -\beta_1 = \beta_2 = 1.1$  and  $\sigma = 1$ ) and  $\pi = 0.16$ . The lattice environment was used.
