# Supplementary material for: Dynamics of Adaptation in Spatially Heterogeneous Metapopulations
Source: PubMed Central journal article supplement (PMC3570538; doi:10.1371/journal.pone.0054697), 2013-02-12
Supplement: pone.0054697.s005.pdf [file pone.0054697.s005.pdf]

# Supporting information: Dynamics of adaptation in spatially heterogeneous metapopulations

J. Papaïx <sup>1,2,a</sup>, O. David <sup>2,b</sup>, C. Lannou <sup>1,c</sup> & H. Monod <sup>2,d</sup>

26/12/2012

<sup>1</sup>INRA, UMR 1290 BIOGER, F-78850 Thiverval Grignon.

<sup>2</sup>INRA, UR 341 Mathématiques et Informatique Appliquées, F-78350 Jouy-en-Josas.

<sup>a</sup>julien.papaix@jouy.inra.fr

<sup>b</sup>olivier.david@jouy.inra.fr

<sup>c</sup>christian.lannou@grignon.inra.fr

<sup>d</sup>herve.monod@jouy.inra.fr

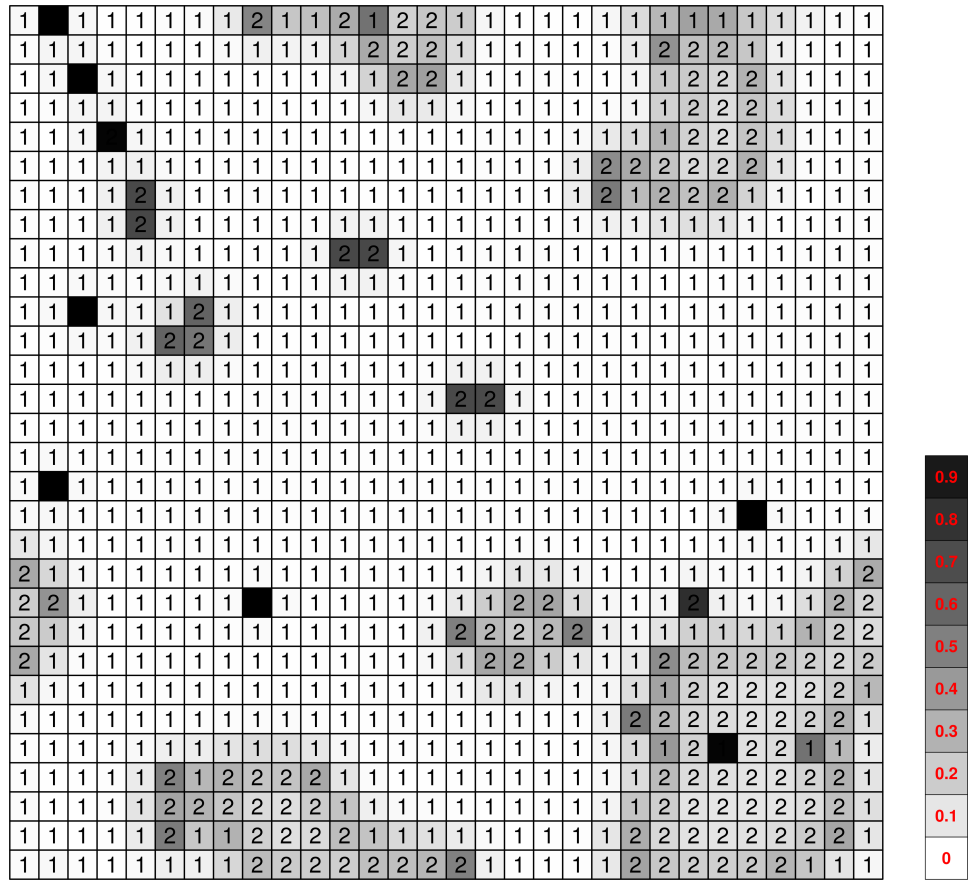

**Figure S5.** Level of local adaptation at the end of a simulation run. The grey scale indicates the mismatch between the mean phenotype ( $\bar{x}_j(t)$ ) and the optimal phenotype ( $\beta_{h(j)}$ ):  $|\bar{x}_j(t) - \beta_{h(j)}|$ . The more adapted the local population, the lighter the grey. Patches are marked by their habitat 1 or 2. In this case, specialisation was predicted according to the analytical branching criterion. Parameters are  $m_s = 15\%$ ,  $\delta/\sigma = 0.8$  ( $\delta = -\beta_1 = \beta_2 = 0.8$  and  $\sigma = 1$ ),  $\pi = 0.16$  and  $AI = 0.7$ . The lattice environment was used.
