# Supplementary material for: Dynamics of Adaptation in Spatially Heterogeneous Metapopulations
Source: PubMed Central journal article supplement (PMC3570538; doi:10.1371/journal.pone.0054697), 2013-02-12
Supplement: pone.0054697.s008.pdf [file pone.0054697.s008.pdf]

# Supporting information: Dynamics of adaptation in spatially heterogeneous metapopulations

J. Papaïx<sup>1,2,a</sup>, O. David<sup>2,b</sup>, C. Lannou<sup>1,c</sup> & H. Monod<sup>2,d</sup>

26/12/2012

<sup>1</sup>INRA, UMR 1290 BIOGER, F-78850 Thiverval Grignon.

<sup>2</sup>INRA, UR 341 Mathématiques et Informatique Appliquées, F-78350 Jouy-en-Josas.

<sup>a</sup>julien.papaix@jouy.inra.fr

<sup>b</sup>olivier.david@jouy.inra.fr

<sup>c</sup>christian.lannou@grignon.inra.fr

<sup>d</sup>herve.monod@jouy.inra.fr

## Appendix S3: hierarchical metapopulation

We consider a metapopulation composed of  $p_1$  groups of  $p_2$  patches, where all the patches have the same relative size  $\bar{K}_j = 1/P$ . Dispersal is symmetric, with three dispersal rates  $m_0$ ,  $m_1$  and  $m_2$  defined as follows :

- $m_{j'j} = m_0$  if patches  $j'$  and  $j$  belong to two different groups,
- $m_{j'j} = m_0 + m_1$  if patches  $j'$  and  $j$  belong to the same group and  $j' \neq j$ ,
- $m_{j'j} = m_0 + m_1 + m_2$  if patches  $j'$  and  $j$  are the same ( $j' = j$ ).

We consider that all propagules land in one patch so that the rates satisfy  $\sum_j m_{j'j} = p_1 p_2 m_0 + p_2 m_1 + m_2 = 1$  and  $m_{+j} = 1/P$ . Under these assumptions, the matrix  $A_{\text{env}}$  is equal to the symmetric dispersal matrix  $M$  defined in the main text (Section 2.2.1), so that

$$A_{\text{env}} = m_0 J_P + m_1 I_{p_1} \otimes J_{p_2} + m_2 I_P,$$

where  $J_P$  is the  $P \times P$  matrix of ones,  $I_P$  is the identity matrix of order  $P$ ,  $I_{p_1} \otimes J_{p_2}$  denotes the block-diagonal matrix with diagonal matrices  $J_{p_2}$  and the symbol  $\otimes$  denotes the Kronecker product. The matrix  $A_{\text{env}}$  can be decomposed into

$$A_{\text{env}} = S_1 + (m_2 + p_2 m_1) S_2 + m_2 S_3, \quad (1)$$

where  $S_1 = \frac{1}{p_1} J_{p_1} \otimes \frac{1}{p_2} J_{p_2}$ ,  $S_2 = (I_{p_1} - \frac{1}{p_1} J_{p_1}) \otimes \frac{1}{p_2} J_{p_2}$ ,  $S_3 = I_{p_1} \otimes (I_{p_2} - \frac{1}{p_2} J_{p_2})$  are the orthogonal projection matrices on three mutually orthogonal subspaces of  $\mathbb{R}^P$  of dimensions 1,  $p_1 - 1$ ,  $p_1(p_2 - 1)$  respectively. This decomposition shows that the eigenvalues of  $A_{\text{env}}$  are 1 with multiplicity one,  $m_2 + p_2 m_1$  with multiplicity  $p_1 - 1$  and  $m_2$  with multiplicity  $p_1(p_2 - 1)$ . The dominant eigenvalue  $\lambda_{\text{env}}^{(1)}$  equals one, as expected, and the normalised dominant eigenvectors respecting the scaling constraints are  $r_{\text{env}}^{(1)} = 1_P/P$  and  $l_{\text{env}}^{(1)} = 1_P$ , where  $1_P$  is the vector of ones of length  $P$ .

These results imply that  $x^* = (1/P) \sum_{j=1}^P \beta_{h(j)}$ . Decomposition (1) also implies that

$$\sum_{j,j' \neq 1} \frac{\lambda_{\text{env}}^{(j)}}{1 - \lambda_{\text{env}}^{(j)}} r_{\text{env}}^{(j)} l_{\text{env}}^{(j)'} = \rho S_2 + \xi S_3$$

and so

$$D_{\text{loc}}^{(2)}(x^*) = \frac{1}{\sigma^2} \left( w' (I_P + 2\rho S_2 + 2\xi S_3) w - 1 \right),$$

where  $\rho = \frac{m_2 + p_2 m_1}{p_1 p_2 m_0}$ ,  $\xi = \frac{m_2}{p_2 m_1 + p_1 p_2 m_0}$  and  $w$  is the vector of length  $P$  with  $j$ th coordinate equal to  $(\beta_{h(j)} - x^*)/(\sqrt{P}\sigma)$ . For  $g = 1, \dots, p_1$  and  $l = 1, \dots, p_2$ , let  $w_{(gl)}$  denote the coordinate of  $w$  associated with patch  $l$  of group  $g$  and let  $w_{(g\bullet)} = (1/p_2) \sum_l w_{(gl)}$ . The vector  $w$  is centred thus  $\sum_{g,l} w_{(gl)} = 0$ . Then we have

$$\begin{aligned} w' S_1 w &= 0, \\ w' S_2 w &= p_2 \sum_g w_{(g\bullet)}^2 \\ &= \sum_k \sum_{k'} \text{Cov}(\pi_k, \pi_{k'}) \frac{(x^* - \beta_k)(x^* - \beta_{k'})}{\sigma^2}, \\ w' (S_2 + S_3) w = w' I_P w &= \sum_{g,l} w_{(gl)}^2 \\ &= \sum_{k=1}^H \pi_k \frac{(x^* - \beta_k)^2}{\sigma^2}. \end{aligned}$$

We note that  $w'S_2w \geq 0$  since  $w'S_2w$  is a quadratic form of a positive semidefinite matrix. After setting  $\nu = \rho - \xi$ , we get

$$D_{\text{loc}}^{(2)}(x^*) = \frac{1}{\sigma^2} \left( (1 + 2\xi) \sum_{k=1}^H \pi_k \frac{(x^* - \beta_k)^2}{\sigma^2} + 2\nu \sum_{k=1}^H \sum_{k'=1}^H \text{Cov}(\pi_k, \pi_{k'}) \frac{(x^* - \beta_k)(x^* - \beta_{k'})}{\sigma^2} - 1 \right).$$

It follows that  $x^*$  is an evolutionarily stable strategy if:

$$(1 + 2\xi) \sum_{k=1}^H \pi_k \frac{(x^* - \beta_k)^2}{\sigma^2} + 2\nu \sum_{k=1}^H \sum_{k'=1}^H \text{Cov}(\pi_k, \pi_{k'}) \frac{(x^* - \beta_k)(x^* - \beta_{k'})}{\sigma^2} < 1.$$

When dispersal is homogeneous ( $m_1 = m_2 = 0$ ), the condition for evolutionary stability becomes:

$$\sum_{k=1}^H \pi_k \frac{(x^* - \beta_k)^2}{\sigma^2} < 1.$$

When dispersal is hindered so that a propagule is more likely to stay in its patch than to land on another patch ( $m_2 \neq 0$ ) and when there is no group structure ( $m_1 = 0$ ), the condition for evolutionary stability becomes:

$$(1 + 2\xi) \sum_{k=1}^H \pi_k \frac{(x^* - \beta_k)^2}{\sigma^2} < 1.$$
